# Supplementary material for: Integrating Routine Hematological and Extended Inflammatory Parameters as a Novel Approach for Timely Diagnosis and Prognosis in Sepsis Management
Source: MDPI journal article supplement (doi:10.3390/diagnostics14090956), 2024-05-02
Supplement: s1 [file s1]

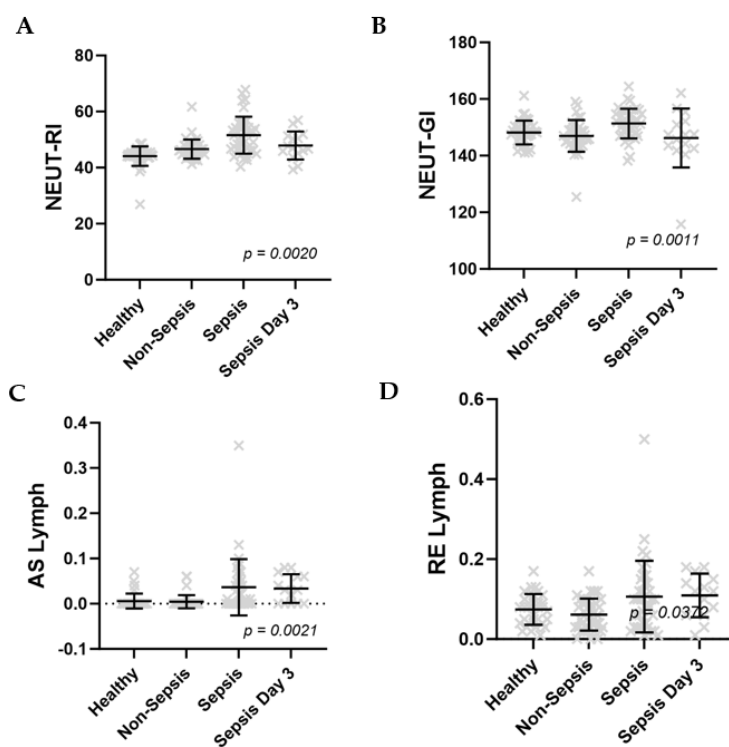

**Supplementary Figure S1.** Analysis of haematology extended inflammatory parameters in sepsis and non-sepsis groups. (A) Neut-RI; (B) Neut-GI; (C) AS-Lymph (D) RE-Lymph.
